# Supplementary material
Source: PubMed Central journal article supplement (PMC5291033)
Supplement: supp_pp.16.01471_PP2016-01471R1_Supplemental_Figures_and_Tables.pdf [file supp_pp.16.01471_PP2016-01471R1_Supplemental_Figures_and_Tables.pdf]

## Supplemental Figure 1.

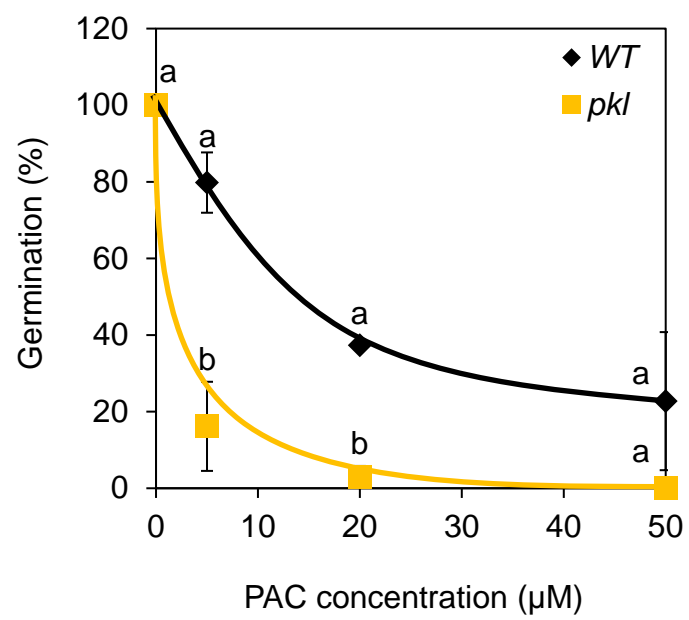

**Supplemental Figure 1. *pkl* is more sensitive to PAC than WT in seed germination.** Data are means  $\pm$  SE (3 biological replicates). Different letters above the curves indicate significant differences,  $p < 0.01$ .

## Supplemental Figure 2.

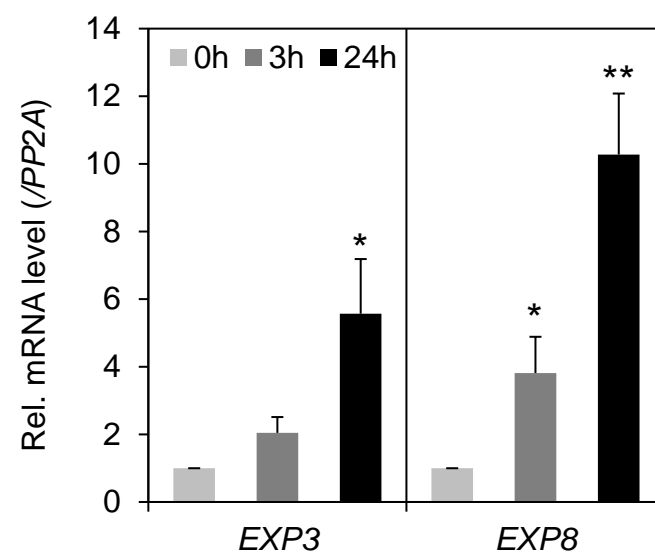

### Supplemental Figure 2. GA induction time course of *EXPs*.

Relative transcript levels of *EXP3* and *EXP8* in 7-day-old *gal-13* seedlings in response to 10µM GA<sub>3</sub> treatment were analyzed by RT-qPCR. Data are means ± SE (3 biological replicates). \*  $p < 0.05$ ; \*\*  $p < 0.01$ .

## Supplemental Figure 3.

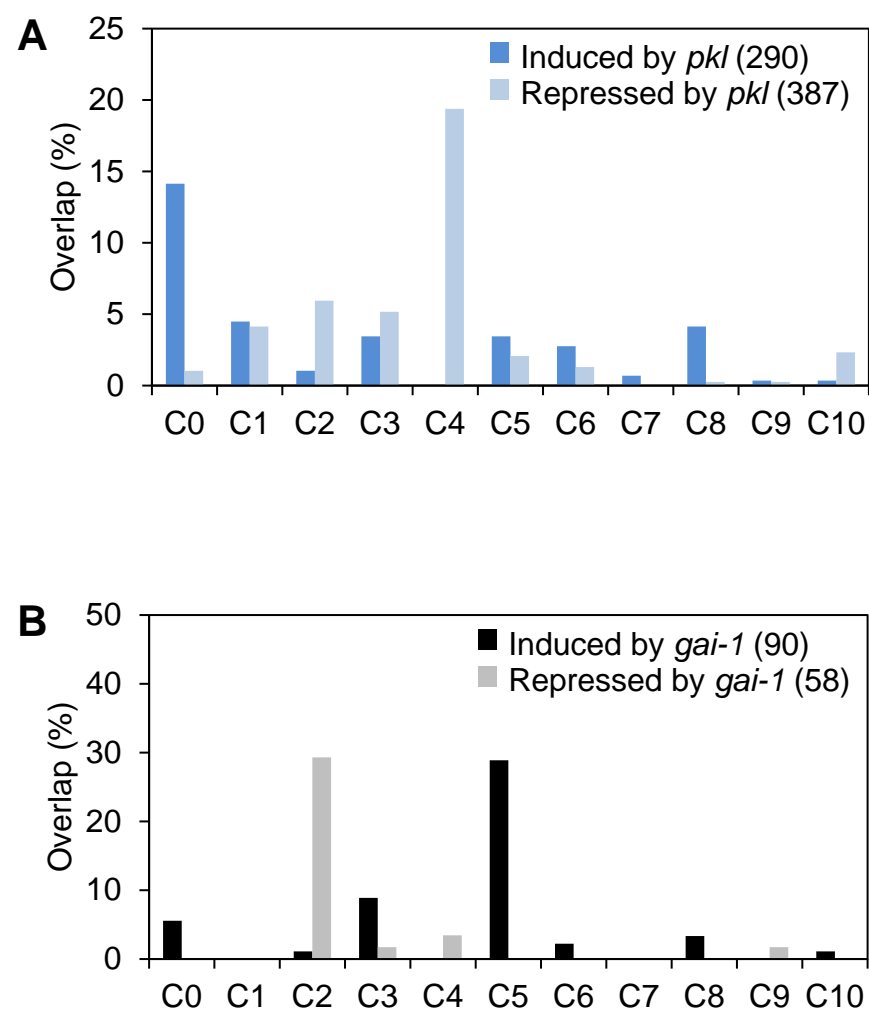

### Supplemental Figure 3. Comparison of RNA-Seq data with previous microarray datasets.

(A) Overlap between C0-C10 clusters and *pkl*-responsive genes. The *pkl*-induced and repressed genes were identified by microarray analysis using 14-d-old WT and *pkl-1* mutant seedlings grown on growth media under 24-hr light (Zhang et al. 2012). Numbers in parentheses are the total of *pkl*-induced or -repressed genes in this published dataset.

(B) Overlap between C0-C10 clusters and *gai*-responsive genes. The *gai*-induced and repressed genes were identified by microarray analysis using WT and *HS::gai-1* transgenic line; The 3-d-old WT and *HS::gai-1* seedlings grown on growth media at 22°C under dark conditions were treated for 30 min at 37°C and then incubated at 22°C for up to 4 hr (Gallego-Bartolome et al., 2011). Numbers in parentheses are the total of *gai-1*-induced or -repressed genes in this published dataset.

In (A) and (B), to calculate the % overlap for each gene cluster, we divided the number of overlapping genes in each category by the total number of genes in that same category in the published dataset.

## Supplemental Figure 4.

| Ribosome-related genes of C7 |               |                   |
|------------------------------|---------------|-------------------|
| GA/Mock                      | <i>ga1-13</i> | <i>ga1-13 pkl</i> |
| Up                           | 94% (174)     | 4% (8)            |
| Down                         | 6% (12)       | 96% (178)         |

**Supplemental Figure 4. Ribosome-related C7 cluster genes were up-regulated by GA in *gal*, but down-regulated by GA in *gal pkl*.**

## Supplemental Figure 5.

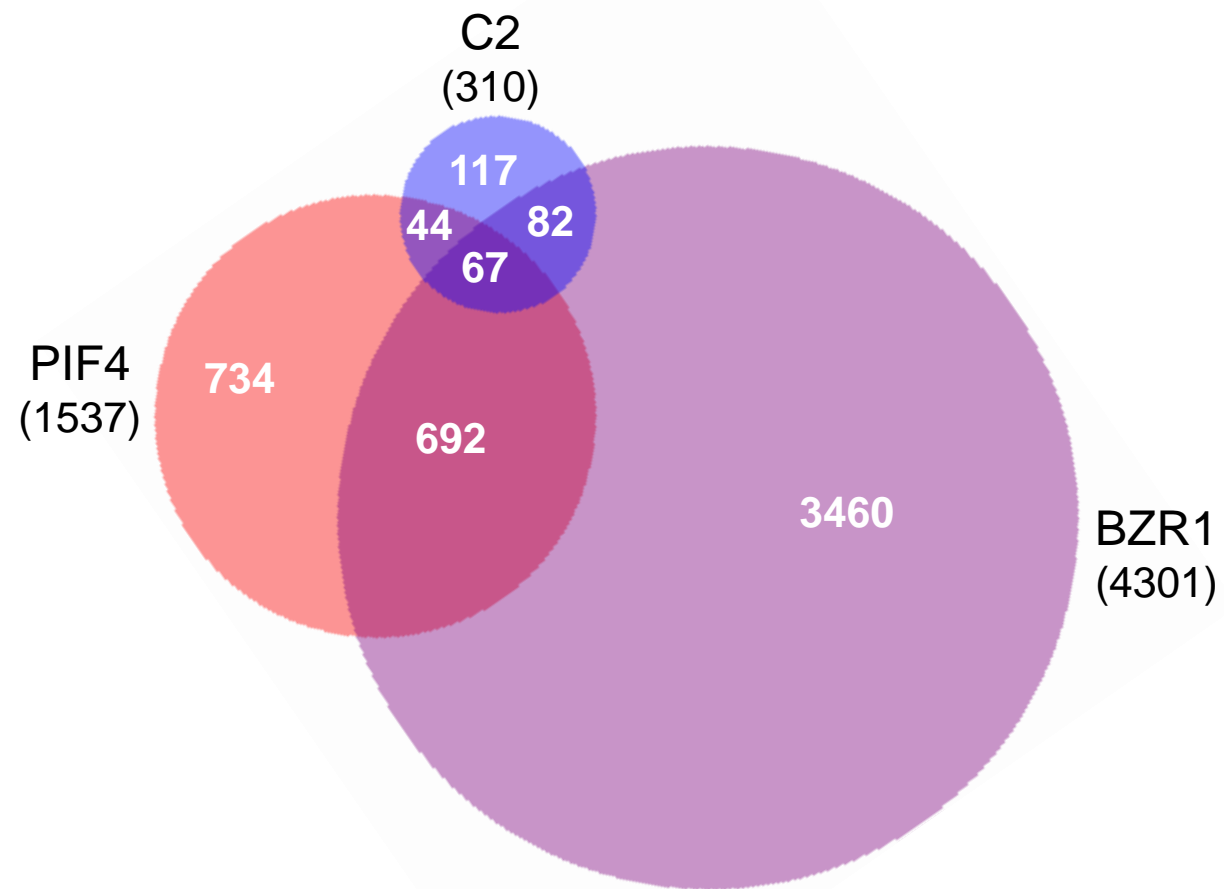

**Supplemental Figure 5. The C2 cluster genes are highly enriched in PIF4- and BZR1-target genes.**

The Venn diagram shows overlap among our C2 cluster genes and the direct target genes of PIF4 and BZR1 (Oh et al., 2012).

**Supplemental Table 1. Summary of GO terms enriched among genes in each cluster.**

| Cluster<br>(Gene #)                      | Enriched GO BP and CC terms                          | Number of genes<br>in the cluster (%)    | Number of genes<br>in the background (%) | FDR         |
|------------------------------------------|------------------------------------------------------|------------------------------------------|------------------------------------------|-------------|
| C0 (483)                                 | <b>response to stimulus<sup>BP</sup></b>             | 98 (21.1)                                | 4057 (10.7)                              | 3.00E-10    |
|                                          | └ response to stress                                 | 67 (14.4)                                | 2320 (6.1)                               | 1.00E-10    |
|                                          | └ defense response                                   | 34 (7.3)                                 | 766 (2.0)                                | 3.00E-12    |
|                                          | └ response to abscisic acid stimulus                 | 17 (3.7)                                 | 378 (1.0)                                | 6.00E-06    |
|                                          | └ regulation of defense response                     | 6 (1.3)                                  | 66 (0.2)                                 | 5.00E-05    |
|                                          | <b>post-embryonic development<sup>BP</sup></b>       | 28 (6.0)                                 | 705 (1.9)                                | 3.00E-08    |
|                                          | └ seed development                                   | 22 (4.7)                                 | 530 (1.4)                                | 8.00E-07    |
|                                          | <b>lipid localization<sup>CC</sup></b>               | 12 (2.6)                                 | 24 (0.1)                                 | 9.00E-61    |
| C1 (823)                                 | <b>metabolic process<sup>BP</sup></b>                | 292 (36.0)                               | 10614 (28.1)                             | 4.00E-05    |
|                                          | └ protein amino acid phosphorylation                 | 55 (6.8)                                 | 946 (2.5)                                | 1.00E-11    |
|                                          | └ sulfate assimilation                               | 5 (0.6)                                  | 13 (0.0)                                 | 1.00E-09    |
|                                          | <b>response to stimulus<sup>BP</sup></b>             | 172 (21.2)                               | 4057 (10.7)                              | 2.00E-18    |
|                                          | └ response to stress                                 | 123 (15.2)                               | 2320 (6.1)                               | 6.00E-22    |
|                                          | └ defense response                                   | 58 (7.2)                                 | 766 (2.0)                                | 5.00E-20    |
|                                          | └ response to endoplasmic reticulum stress           | 8 (1.0)                                  | 23 (0.1)                                 | 2.00E-15    |
|                                          | └ innate immune response                             | 36 (4.4)                                 | 347 (0.9)                                | 5.00E-20    |
|                                          | └ systemic acquired resistance                       | 9 (1.1)                                  | 54 (0.1)                                 | 3.00E-08    |
|                                          | <b>plasma membrane<sup>CC</sup></b>                  | 80 (9.9)                                 | 1456 (3.9)                               | 2.00E-15    |
|                                          | <b>endoplasmic reticulum<sup>CC</sup></b>            | 40 (4.9)                                 | 466 (1.2)                                | 6.00E-17    |
|                                          | <b>proteasome complex<sup>CC</sup></b>               | 11 (1.4)                                 | 67 (0.2)                                 | 9.00E-11    |
|                                          | C2 (310)                                             | <b>response to stimulus<sup>BP</sup></b> | 69 (22.6)                                | 4057 (10.7) |
| └ response to chemical stimulus          |                                                      | 44 (14.4)                                | 2085 (5.5)                               | 4.00E-09    |
| └ response to auxin stimulus             |                                                      | 24 (7.9)                                 | 360 (1.0)                                | 5.00E-29    |
| └ response to gibberellin stimulus       |                                                      | 8 (2.6)                                  | 159 (0.4)                                | 5.00E-06    |
| <b>developmental growth<sup>BP</sup></b> |                                                      | 11 (3.6)                                 | 242 (0.6)                                | 2.00E-07    |
| └ unidimensional cell growth             |                                                      | 8 (2.6)                                  | 186 (0.5)                                | 7.00E-05    |
| <b>cell wall<sup>CC</sup></b>            |                                                      | 27 (8.9)                                 | 403 (1.1)                                | 6.00E-34    |
| <b>anchored to membrane<sup>CC</sup></b> |                                                      | 13 (4.3)                                 | 272 (0.7)                                | 3.00E-10    |
| <b>apoplast<sup>CC</sup></b>             |                                                      | 10 (3.3)                                 | 182 (0.5)                                | 2.00E-09    |
| C3 (645)                                 | <b>metabolic process<sup>BP</sup></b>                | 258 (40.6)                               | 10614 (28.1)                             | 3.00E-10    |
|                                          | └ photosynthesis                                     | 37 (5.8)                                 | 162 (0.4)                                | 3.00E-73    |
|                                          | └ photosynthesis, light reaction                     | 23 (3.6)                                 | 103 (0.3)                                | 2.00E-43    |
|                                          | └ electron transport chain                           | 13 (2.0)                                 | 88 (0.2)                                 | 4.00E-15    |
|                                          | └ cellular nitrogen compound metabolic process       | 29 (4.6)                                 | 506 (1.3)                                | 1.00E-09    |
|                                          | └ carbohydrate catabolic process                     | 13 (2.0)                                 | 128 (0.3)                                | 9.00E-10    |
|                                          | └ starch catabolic process                           | 5 (0.8)                                  | 15 (0.0)                                 | 3.00E-11    |
|                                          | <b>response to abiotic stimulus<sup>BP</sup></b>     | 59 (9.3)                                 | 1471 (3.9)                               | 7.00E-10    |
|                                          | └ response to light stimulus                         | 29 (4.6)                                 | 596 (1.6)                                | 3.00E-07    |
|                                          | └ phototropism                                       | 5 (0.8)                                  | 25 (0.1)                                 | 3.00E-07    |
|                                          | <b>cellular component biogenesis<sup>BP</sup></b>    | 35 (5.5)                                 | 571 (1.5)                                | 5.00E-13    |
|                                          | └ ribosome biogenesis                                | 19 (3.0)                                 | 241 (0.6)                                | 3.00E-10    |
|                                          | └ protein complex assembly                           | 16 (2.5)                                 | 134 (0.4)                                | 9.00E-15    |
|                                          | <b>chloroplast organization<sup>BP</sup></b>         | 12 (1.9)                                 | 73 (0.2)                                 | 2.00E-15    |
|                                          | <b>protein targeting to chloroplast<sup>BP</sup></b> | 7 (1.1)                                  | 33 (0.1)                                 | 4.00E-11    |
|                                          | <b>plastid<sup>CC</sup></b>                          | 270 (42.5)                               | 2965 (7.9)                               | 2.00E-210   |
|                                          | └ plastid thylakoid membrane                         | 63 (9.9)                                 | 231 (0.6)                                | 1.00E-152   |
|                                          | └ plastid stroma                                     | 62 (9.8)                                 | 322 (0.9)                                | 2.00E-107   |
|                                          | └ plastid envelope                                   | 54 (8.5)                                 | 331 (0.9)                                | 2.00E-78    |
|                                          | <b>ribosome<sup>CC</sup></b>                         | 41 (6.5)                                 | 524 (1.4)                                | 5.00E-24    |
| C4 (420)                                 | <b>response to stimulus<sup>BP</sup></b>             | 92 (22.4)                                | 4057 (10.7)                              | 1.00E-11    |
|                                          | └ response to abiotic stimulus                       | 45 (11.0)                                | 1471 (3.9)                               | 1.00E-10    |
|                                          | └ response to radiation                              | 24 (5.9)                                 | 613 (1.6)                                | 1.00E-08    |
|                                          | └ response to cold                                   | 14 (3.4)                                 | 328 (0.9)                                | 2.00E-05    |
|                                          | <b>photosynthesis<sup>BP</sup></b>                   | 21 (5.1)                                 | 162 (0.4)                                | 2.00E-37    |
|                                          | <b>lipid localization<sup>BP</sup></b>               | 5 (1.2)                                  | 24 (0.1)                                 | 1.00E-11    |
|                                          | <b>plastid<sup>CC</sup></b>                          | 88 (21.5)                                | 2965 (7.9)                               | 3.00E-22    |
|                                          | └ plastid thylakoid                                  | 26 (6.3)                                 | 293 (0.8)                                | 6.00E-32    |
|                                          | <b>photosynthetic membrane<sup>CC</sup></b>          | 32 (7.8)                                 | 273 (0.7)                                | 2.00E-53    |
|                                          | └ photosystem I                                      | 8 (2.0)                                  | 22 (0.1)                                 | 2.00E-35    |

(continued) **Supplemental Table 1. Summary of GO terms enriched among genes in each cluster.**

| Cluster<br>(Gene #) | Enriched GO BP and CC terms                                       | Number of genes<br>in the cluster (%) | Number of genes<br>in the background (%) | FDR       |
|---------------------|-------------------------------------------------------------------|---------------------------------------|------------------------------------------|-----------|
| C5 (468)            | <b>response to stimulus</b> <sup>BP</sup>                         | 94 (20.9)                             | 4057 (10.7)                              | 6.00E-10  |
|                     | └ response to chemical stimulus                                   | 60 (13.4)                             | 2085 (5.5)                               | 1.00E-10  |
|                     | └ response to gibberellin stimulus                                | 21 (4.7)                              | 159 (0.4)                                | 4.00E-34  |
|                     | └└ gibberellin signaling pathway                                  | 6 (1.3)                               | 40 (0.1)                                 | 7.00E-10  |
|                     | └ response to abscisic acid stimulus                              | 17 (3.8)                              | 378 (1.0)                                | 1.00E-06  |
|                     | └ response to abiotic stimulus                                    | 49 (10.9)                             | 1471 (3.9)                               | 9.00E-12  |
|                     | └ response to salt stress                                         | 18 (4.0)                              | 366 (1.0)                                | 3.00E-08  |
|                     | └ response to cold                                                | 16 (3.6)                              | 328 (0.9)                                | 4.00E-07  |
|                     | <b>secondary metabolic process</b> <sup>BP</sup>                  | 21 (4.7)                              | 489 (1.3)                                | 1.00E-07  |
|                     | └ flavonoid biosynthetic process                                  | 9 (2.0)                               | 69 (0.2)                                 | 2.00E-13  |
|                     | └ gibberellin biosynthetic process                                | 6 (1.3)                               | 19 (0.1)                                 | 2.00E-19  |
|                     | <b>polysaccharide metabolic process</b> <sup>BP</sup>             | 12 (2.7)                              | 152 (0.4)                                | 3.00E-10  |
|                     | └ starch metabolic process                                        | 8 (1.8)                               | 41 (0.1)                                 | 1.00E-17  |
| C6 (269)            | <b>metabolic process</b> <sup>BP</sup>                            | 292 (36.0)                            | 10614 (28.1)                             | 4.00E-05  |
|                     | └ response to chemical stimulus                                   | 46 (17.3)                             | 2085 (5.5)                               | 5.00E-14  |
|                     | └ response to chitin                                              | 13 (4.9)                              | 151 (0.4)                                | 1.00E-23  |
|                     | └ response to abscisic acid stimulus                              | 12 (4.5)                              | 378 (1.0)                                | 3.00E-06  |
|                     | └ response to stress                                              | 40 (15.0)                             | 2320 (6.1)                               | 3.00E-07  |
|                     | └ defense response to bacterium                                   | 7 (2.6)                               | 177 (0.5)                                | 1.00E-04  |
|                     | └ regulation of defense response                                  | 6 (2.3)                               | 66 (0.2)                                 | 2.00E-10  |
|                     | <b>aromatic compound biosynthetic process</b> <sup>BP</sup>       | 10 (3.8)                              | 237 (0.6)                                | 2.00E-07  |
|                     | └ flavonoid biosynthetic process                                  | 6 (2.3)                               | 69 (0.2)                                 | 5.00E-10  |
| C7 (118)            | <b>metabolic process</b> <sup>BP</sup>                            | 95 (80.5)                             | 10614 (28.1)                             | 5.00E-35  |
|                     | └ translation                                                     | 68 (57.6)                             | 1445 (3.8)                               | 9.00E-190 |
|                     | <b>secondary metabolic process</b> <sup>BP</sup>                  | 13 (11.0)                             | 489 (1.3)                                | 8.00E-18  |
|                     | └ glucosinolate biosynthetic process                              | 11 (9.3)                              | 41 (0.1)                                 | 2.00E-144 |
|                     | <b>ribosome biogenesis</b> <sup>BP</sup>                          | 23 (19.5)                             | 241 (0.6)                                | 6.00E-126 |
|                     | <b>ribosome</b> <sup>CC</sup>                                     | 69 (58.5)                             | 524 (1.4)                                | 0         |
| C9 (113)            | <b>cellular nitrogen compound metabolic process</b> <sup>BP</sup> | 10 (9.2)                              | 506 (1.3)                                | 7.00E-09  |
|                     | <b>flower development</b> <sup>BP</sup>                           | 8 (7.3)                               | 377 (1.0)                                | 1.00E-07  |
|                     | <b>sulfur compound biosynthetic process</b> <sup>BP</sup>         | 5 (4.6)                               | 115 (0.3)                                | 6.00E-10  |

\* C8 and C10: No significant enrichment of GO terms were found.

**Supplemental Table 2. List of Primers and Their Uses.**

| <b>Primer</b>           | <b>Forward primer / LP</b>          | <b>Reverse primer / RP</b> | <b>Note</b>          |
|-------------------------|-------------------------------------|----------------------------|----------------------|
| <b>Genotyping</b>       |                                     |                            |                      |
| <i>gal-13</i>           | TTGATTTTGGTCGTACATGTGAG             | ACGCAAACCCAATCTATCATG      | SALK_109115          |
| <i>pkl</i>              | AACAGGTTTCCCTGGATGATC               | GGAAGATGTGAGCTCTGATGG      | SAIL_73_H08          |
| <i>rga-29</i>           | ATGAATGATGATTGAAGTGG                | CTAAACGAACACCGTTCTCT       | SALK_089146          |
| <i>gai-t6</i>           | GAAGACGACGGTAACGGCAT                | ATAATCGAAATTATCCGGTGC      |                      |
| <i>rgl1</i>             | AAAGTTCGATCATCCGACATG               | AAAACTTATCGATGGAACCGG      | SALK_136145          |
| <i>rgl2</i>             | AAAAACCTTACCAACCCATGAAG             | TGAGCGAACTTCAGGTAAGGG      | SALK_027654          |
| <i>rgl3-3</i>           | ATGAAACGAAGCCATCAAGAAACG            | GGGCGAAATTGTCACAAAACGAAAC  | CS16355              |
| <i>gai-1</i>            | ATGAAGAGAGATCATCATCA                | TCAAGCCACGTGTAAAGCTC       | CS63                 |
| LBb1.3                  | ATTTTGCCGATTTTCGGAAC                |                            | LB for SALK lines    |
| LB3                     | TAGCATCTGAATTTTCATAACCAATCTCGATACAC |                            | LB for SAIL lines    |
| Ds5'                    | TCCGTTCCGTTTTTCGTTTTTTAC            |                            | LB for <i>gai-t6</i> |
| <b>Quantitative PCR</b> |                                     |                            |                      |
| PP2A                    | TATCGGATGACGATTCTTCGTGCAG           | GCTTGGTCGACTATCGGAATGAGAG  | AT1G13320            |
| LEC1                    | TACCTCCTCCGGGTCCTTATGGTT            | CAAAAGCCGGCATTCCGTTAATGG   | AT1G21970            |
| FUS3                    | CTGTGGTTAACGATCTTCTCCTCC            | CGTTGGAGGTAAGAGCCGTCGTG    | AT3G26790            |
| ABI3                    | TCACCTTCAACATGGGTTCTCCA             | GAGTAATCTCTGATCTCTCATTTG   | AT3G24650            |
| EXP8                    | CATGTATGAAGAAAGGAGGAATAAG           | AACTGCCAATTAGAAGGAGCCACG   | AT2G40610            |
| PRE1                    | CAGCCTCGAAAGTATTGCAAG               | TTCTAATAACGGCGGCTTCAG      | AT5G39860            |
| SPL3                    | TGAGAAGAAGCAAAGCGGAA                | TATCCGCGGTACAACCTCTCG      | AT2G33810            |
| SPL5                    | ATGCAGCAGGTTTCATGAGC                | GCCTGACCCTTCTCCAAAAC       | AT3G15270            |
| LFY                     | CCTAGACGAAGAAGCTTCAAATGC            | CAGCCATGACGACAAGCGATGTTT   | AT5G61850            |
| FUL                     | GTCAGCAAGAAGGACAATTAGTCC            | GAGAGTTTGGTTCCGTCAACGAC    | AT5G60910            |
| GA3OX1                  | GCTCGTGGTTAACGTTGGTGAC              | CGATTCAACGGGACTAACCAGC     | AT1G15550            |
| GA20OX1                 | CAATGGCGCTCCATTCGTCCCAAC            | GCTCTCTCGGTGGCGTCACTACTC   | AT4G25420            |
| SCL3                    | CAGCTGAGGCACGTGAGAATGAT             | ACCACCATGACCTTTGGAGACAAAC  | AT1G50420            |
| GID1A                   | CGAGCGATGAAGTTAATCT                 | GAAAACCCCATCAACCG          | AT3G05120            |
| GID1B                   | AGAGGTCAAAGCCTTAAAGGAGTC            | CTTCAAGACCAGTCTTCTTAAGCCC  | AT3G63010            |
| PAP1                    | GAGAAATTCCTAGAGGAAAGCCAAG           | CACAGTCTCTCCATCGAAAAGACTC  | AT1G56650            |
| EXP1                    | TTACCTTAACGGACAATCTCTCTC            | TCTAACTGCTTCTACTGTGAAGGT   | AT1G69530            |
| EXP3                    | TCAGATACTTCAATCTTGTCTGG             | TGCCAGTTCTGTCCCAGTTCCGA    | AT2G37640            |
| XTH8                    | CCACAACAGAGAATTGGTGGGATC            | GGGAACCTCTCACTGTCTTTGC     | AT1G11545            |
| XTH16                   | CGCTGCAGCTTGTACTGTTTCTTC            | GCTCATTAGCCACTTGAGATTCAC   | AT3G23730            |
| AGP21                   | GCTCCAAGCCCAACTTCTGATG              | TCAAAAGATGAAACCAGATGCC     | AT1G55330            |
| PLL20                   | CGGAGCATTTTTTACACGTTCTGG            | ATGGTGCCGACGAGTGAGGATG     | AT3G07010            |
| IAA19                   | GGTGACAACCTGCGAATACGTTACCA          | CCCGGTAGCATCCGATCTTTTCA    | AT3G15540            |
| GH3.3                   | GAAGTCATGGCTCGGTGCTGCTTG            | GTATCTCGAGTGGTCCCTATCGAC   | AT2G23170            |
| SAUR16                  | CCTGATCCTTCTTCAACAAGCAGAG           | CATCTGATCATGGATGTTAGAGAGAG | AT4G38860            |
| PRE5                    | GGTACTACAAGAGACATGCAAC              | GAGTAAGCTTCTAATCACGGC      | AT3G28857            |
| HBI1                    | GATTTGTCTGCGATAAACCCG               | CGAGGCTAGATGTGTTGTAGAGAC   | AT2G18300            |
| SPL9                    | GTAGTGGCACGGCAATGGGTGA              | GAAGAGTCATAAGCCCTTGTGTTT   | AT2G42200            |
| CYCB1;4                 | CTCGGAAGATGAGATTATGGAGC             | CAACTTCAGCGTTTTCTGAGACAG   | AT2G26760            |
| CYCB2;2                 | GGTGAGACTACATCAGAAAGCTGG            | GAGAATCTGACACAAGAAAGTGTGC  | AT4G35620            |
